# Supplementary material for: Fabrication of dual-functional electrochromic smart window based on low-cost hybrid transparent electrode coated with a solution-processable polymer
Source: Royal Society of Chemistry journal article supplement (doi:10.1039/d2ta05973h), 2022-01-01
Supplement: d2ta05973h2.pdf [file d2ta05973h2.pdf]

## **Electronic Supplementary Information**

### **Fabrication of dual-functional electrochromic smart window based on low-cost hybrid transparent electrode coated with a solution-processable polymer**

Subash Cherumannil Karumuthil <sup>a</sup>, Mukhesh K. Ganesh <sup>a,†</sup>, Indrajit Mondal <sup>b,†</sup>, Ashutosh K. Singh <sup>a\*</sup>, and Giridhar U. Kulkarni <sup>a,b\*</sup>

*<sup>a</sup>Centre for Nano and Soft Matter Sciences, Bangalore-562162, India.*

*<sup>b</sup>Chemistry & Physics of Materials Unit, Jawaharlal Nehru Centre for Advanced Scientific Research, Bangalore-560064, India.*

\* Corresponding authors

E-mail addresses: Prof. Giridhar U. Kulkarni ([gukulk@gmail.com](mailto:gukulk@gmail.com), [kulkarni@jncasr.ac.in](mailto:kulkarni@jncasr.ac.in))

Ashutosh K. Singh ([ashuvishen@gmail.com](mailto:ashuvishen@gmail.com), [aksingh@cens.res.in](mailto:aksingh@cens.res.in))

†These authors contributed equally.

## TABLE OF CONTENTS

| Supplementary information | Details                                                                                                    | Page no. |
|---------------------------|------------------------------------------------------------------------------------------------------------|----------|
| S1                        | Energy dispersive spectroscopy elemental analysis of synthesized PMOANI                                    | 3        |
| S2                        | Solvent selection for dispersing PMOANI                                                                    | 3        |
| S3                        | Photographs of spin coated PMOANI on electrode at lower acceleration                                       | 4        |
| S4                        | Optimization of coating parameters and concentration of PMOANI                                             | 4        |
| S5                        | Schematic of fabrication steps of electrode making                                                         | 5        |
| S6                        | FESEM images of PMOANI coating                                                                             | 5        |
| S7                        | Cyclic stability of 2.5% PMOANI on different electrodes                                                    | 6        |
| S8                        | Characterization of PMOANI coated ITO-60 nm/Al-mesh before and after cyclic stability test                 | 7        |
| S9                        | X-ray photoelectron spectroscopy of PMOANI coated ITO-60 nm/Al-mesh before and after cyclic stability test | 8        |
| S10                       | Video showing dual functionality of EES device                                                             | 9        |
| S11                       | Comparative study on electrochromic and energy storage performance of reported devices                     | 9        |
|                           | Supplementary information references                                                                       | 10       |

## Supplementary information - S1

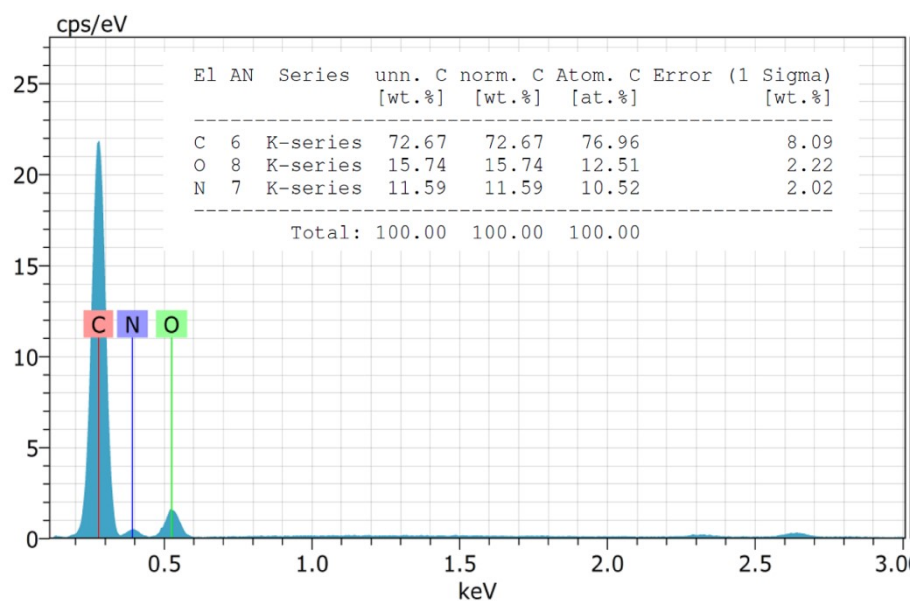

Figure S1: Energy dispersive spectroscopy elemental analysis of synthesized PMOANI.

## Supplementary information - S2

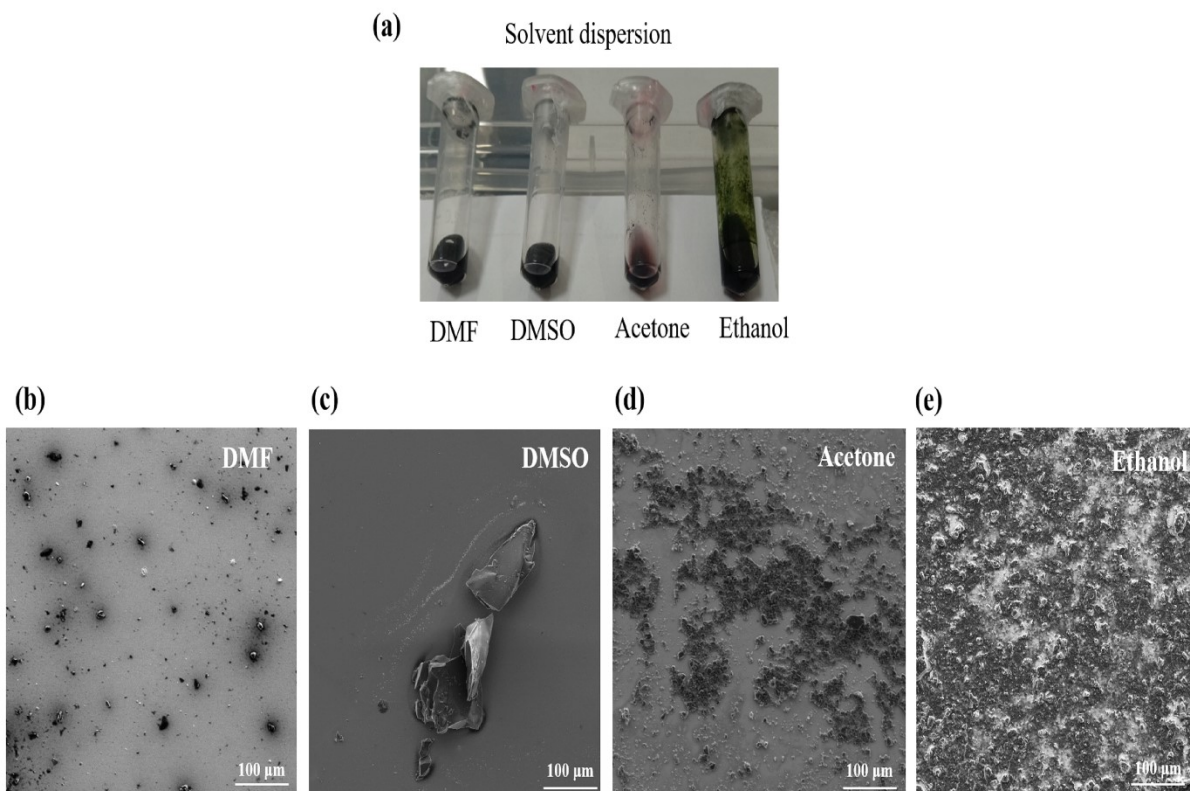

Figure S2: Solvent selection for dispersing PMOANI: (a) photographs of dispersion in different solvents, (b) – (e) FESEM images of PMOANI films dispersed in different solvents.

### Supplementary information - S3

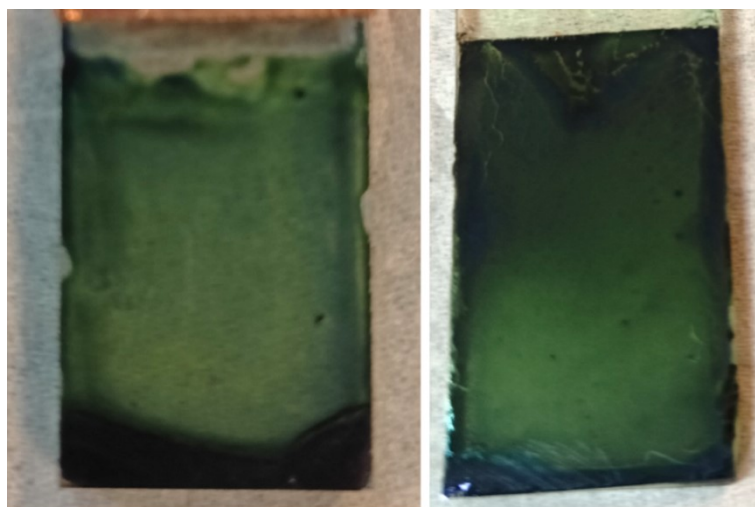

Figure S3: Photographs showing the sagginess of film at edges of spin coated PMOANI on electrode at lower acceleration ( $< 300 \text{ rpm/s}^2$ ).

### Supplementary information - S4

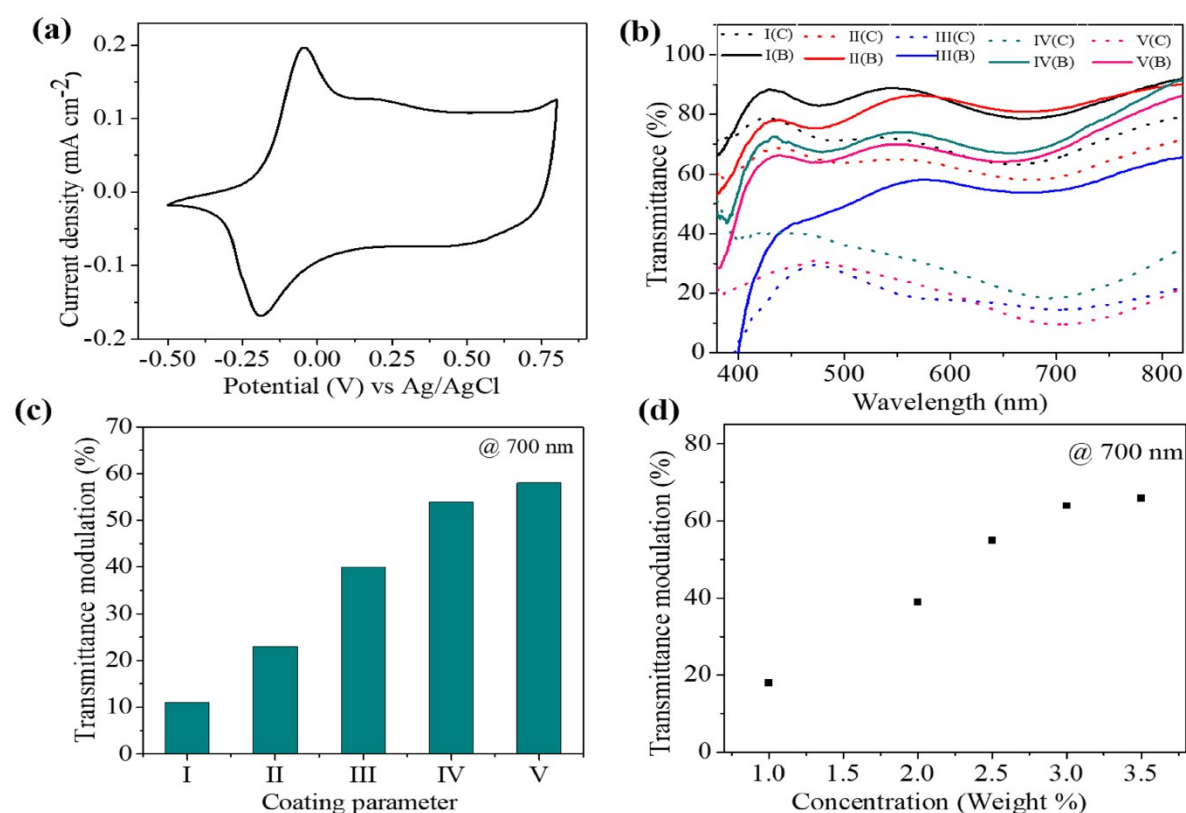

Figure S4: (a) Cyclic voltammogram of PMOANI coated on ITO using 500\_500 ((RPM\_acceleration)) coating parameter. (b) bleached (B) and coloured (C) state transmittance spectra of the films coated at different spin coating recipe (I) 1000\_150, (II) 1000\_100, (III) 1000\_40, (IV) 500\_500, (V) 500\_150. (c) the corresponding modulation plot at 700 nm (d) transmittance modulation by the films prepared using different concentrations of PMOANI at 700 nm.

## Supplementary information - S5

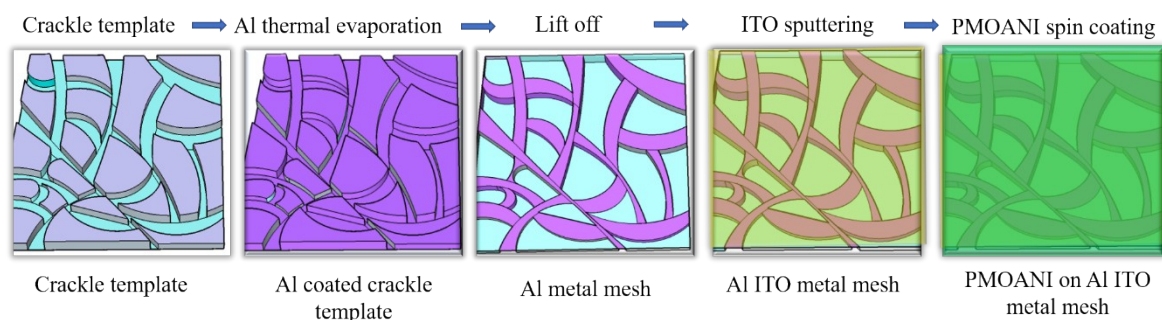

Figure S5: Schematic of fabrication steps for making PMOANI electrode on ITO/Al mesh transparent conducting electrode.

## Supplementary information - S6

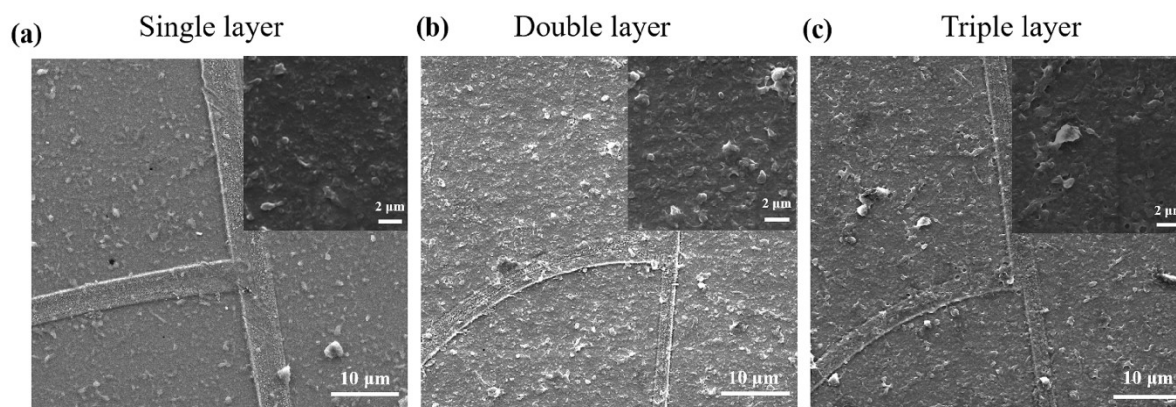

Figure S6: FESEM images of PMOANI coating on ITO (60 nm)/Al-mesh TCE in different layers (high magnification images are shown in inset) (a) single layer, (b) double layer, (c) triple layer.

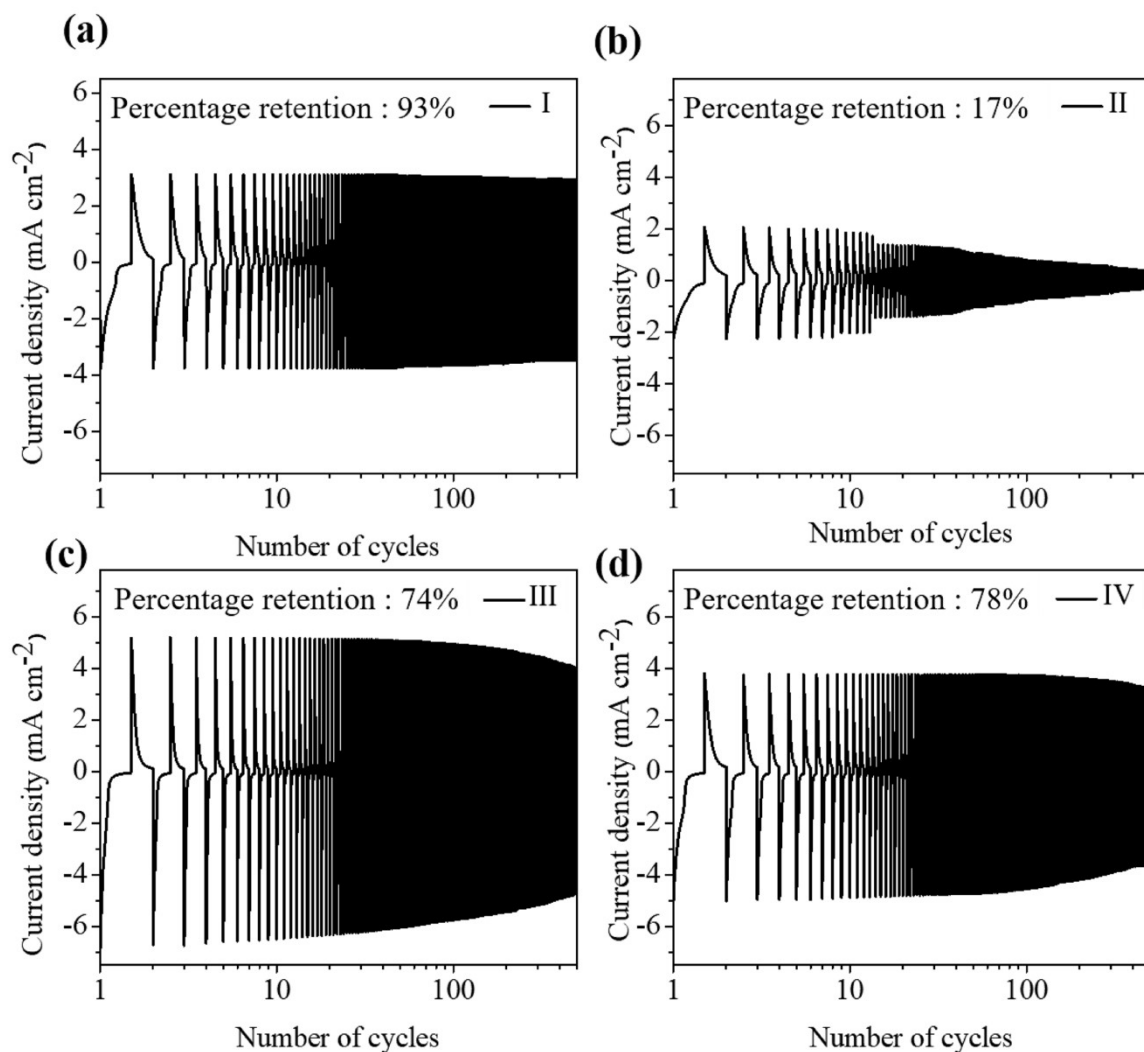

Figure S7: Cyclic stability of optimized PMOANI on different electrodes for 500 cycles when switched between -0.5 to +0.8 V for 10 s per step (percentage retention is also mentioned): (a) ITO (280 nm), (b) ITO (30 nm)/Al-mesh TCE, (c) ITO (60 nm)/Al-mesh TCE, (d) ITO (100 nm)/Al-mesh TCE.

Supplementary information - S8

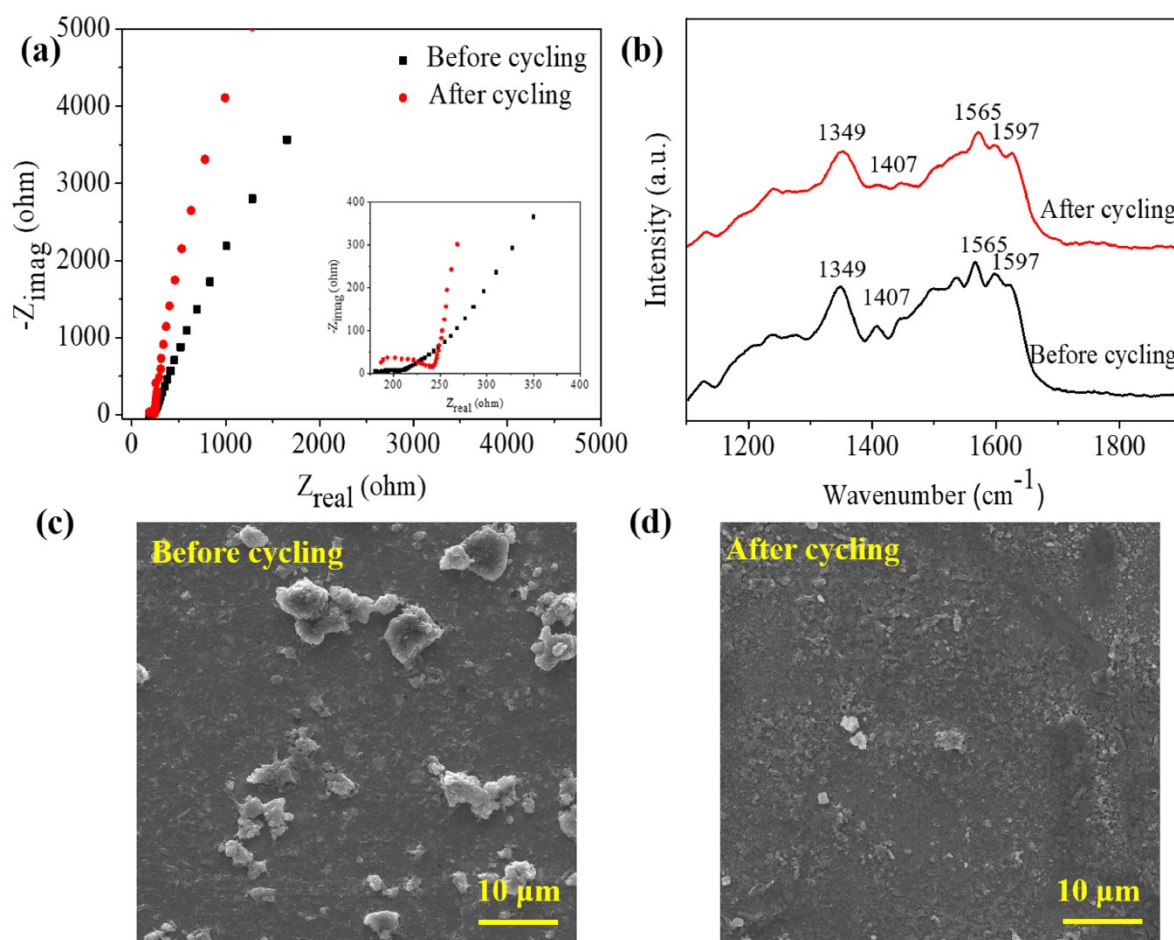

Figure S8: Characterization of PMOANI coated ITO-60 nm/Al-mesh before and after cyclic stability test (a) EIS spectra, high-frequency spectra in the inset, (b) Raman spectra, (c) FESEM image before cycling test, (d) FESEM image after the cycling test.

Supplementary information – S9

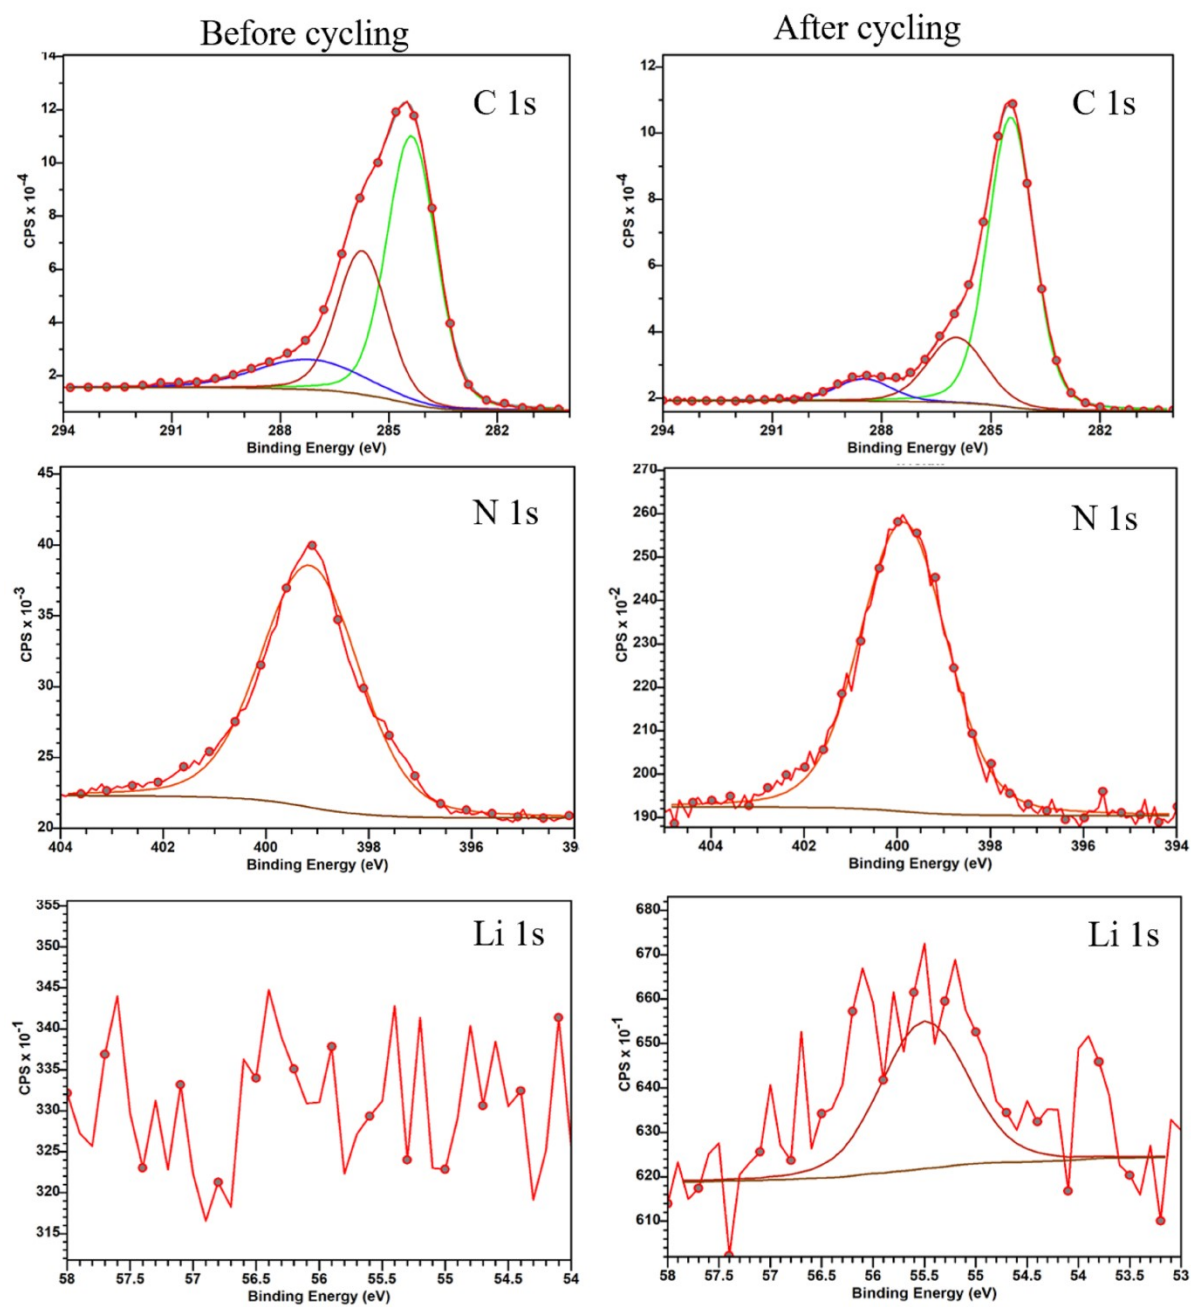

Figure S9: X-ray photoelectron spectroscopy of PMOANI coated ITO-60 nm/Al-mesh before and after cyclic stability test



### Supplementary information - S10

Video showing dual functionality of EES device – Supplementary movie 1.

Supplementary movie 1 shows the dual functionality of the fabricated EES device of  $\sim 15 \text{ cm}^2$  size. The movie shows the charging of the EES device for 2 min and the colour of the device was changed to blue from transparent. After removing the charging terminal, the EES device was connected to a liquid crystal timer display (operational voltage: 1.2 V) and the timer display started glowing. The timer display shows 1 h : 02 min (1:02). The EES device was powering the display for more than 20 min, and the fading of the display started by showing 1 h: 25 min (1:25). While discharging, blue colour was slowly fading and approaching to transparency. The presented supplementary movie was 32x (32 times) fast-forwarded.

### Supplementary information - S11

Comparative study on electrochromic and energy storage performance of reported devices

| Active materials                                                | Arial capacitance (mF cm <sup>-2</sup> ) | Optical modulation (%) | Supplementary information reference number |
|-----------------------------------------------------------------|------------------------------------------|------------------------|--------------------------------------------|
| Poly aniline                                                    | 0.017                                    | 30                     | 1                                          |
| Poly aniline /Tungsten oxide                                    | 0.025                                    | 35.3                   | 2                                          |
| Tungsten oxide /graphene/Polyaniline                            | 3.414                                    | 4.52                   | 3                                          |
| PANI-functionalized Nickel oxide                                | 1.1                                      | 40                     | 4                                          |
| Polyaniline/ hybrid graphene/ Copper sulfide                    | 17.3                                     | 40.1                   | 5                                          |
| Polyimide/indacenodithiophene                                   | 6.2                                      | 21.84                  | 6                                          |
| Poly(indole-6-carboxylic acid)                                  | 16.2                                     | 43                     | 7                                          |
| Vertical Gold Nanowires/ Polyaniline                            | 11.76                                    | -                      | 8                                          |
| Poly(3,4-ethylenedioxythiophene)                                | $\sim 10$                                | -                      | 9                                          |
| Poly(o-methoxyaniline)/ hybrid transparent conducting electrode | $\sim 8$                                 | 57                     | This work                                  |

### Supplementary information references

1. K. Wang, H. p. Wu, Y. N. Meng, Y. J. Zhang and Z. X. Wei, *Energy Environ. Sci.*, 2012, **5**, 8384–8389.
2. H. G. Wei, X. R. Yan, S. J. Wu, Z. P. Luo, S. Y. Wei and Z. H. Guo, *J. Phys. Chem. C*, 2012, **116**, 25052–25064.
3. H. L. Lyu, *Polymers*, 2020, **12**, 49.
4. M. Jamdegni and A. Kaur, *Electrochim. Acta*, 2020, **331**, 135359.
5. P. J. Yao, S. Y. Xie, M. D. Ye, R. Yu, Q. Liu, D. D. Yan, W. W. Cai, W. X. Guo and X. Y. Liu, *RSC Adv.*, 2017, **7**, 29088–29095.
6. Y. Sun, X. Zhao, G. Q. Zhu, M. Li, X. Q. Zhang, H. Yang and B. P. Lin, *Electrochim. Acta*, 2020, **333**, 135495.
7. J. J. Li, Q. F. Guo, Y. Lu and G. M. Nie, *Eur. Polym. J.*, 2019, **113**, 29–35.
8. T. An, Y. Ling, S. Gong, B. Zhu, Y. Zhao, D. Dong, L. W. Yap, Y. Wang and W. Cheng, *Adv. Mater. Technol.*, 2019, **4**, 1800473.
9. A. M. Osterholm, D. E. Shen, A. L. Dyer and J. R. Reynolds, *ACS Appl. Mater. Interfaces*, 2013, **5**, 13432–13440.
